# Supplementary material for: Impact of Poloxamer on Crystal Nucleation and Growth of Amorphous Clotrimazole
Source: MDPI journal article supplement (doi:10.3390/pharmaceutics15082164), 2023-08-21
Supplement: s1 [file s1]

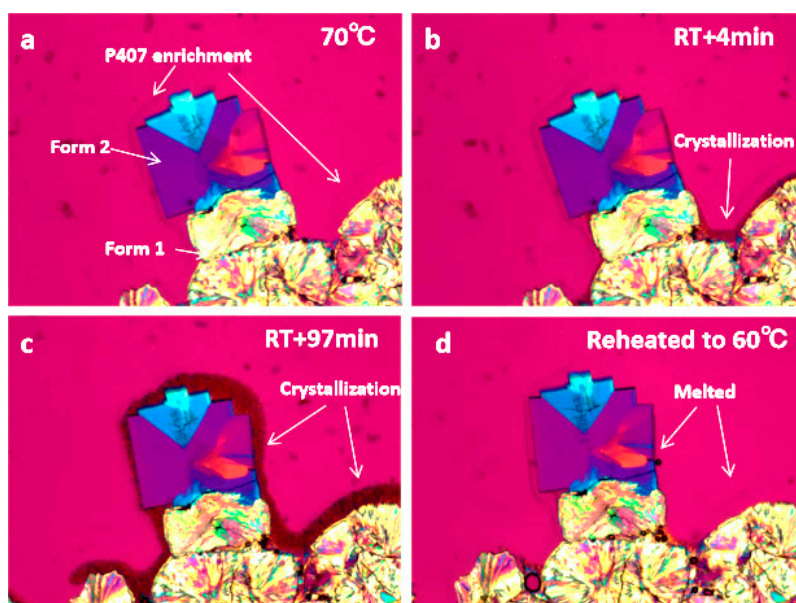

Figure S1. Photomicrographs of CMZ crystals grown in the presence of 10% w/w PEO at 70 °C (a); cooled to 25 °C and held for 4 min (b); cooled to 25 °C and held for 97 min (c); and reheated to 60 °C (d).

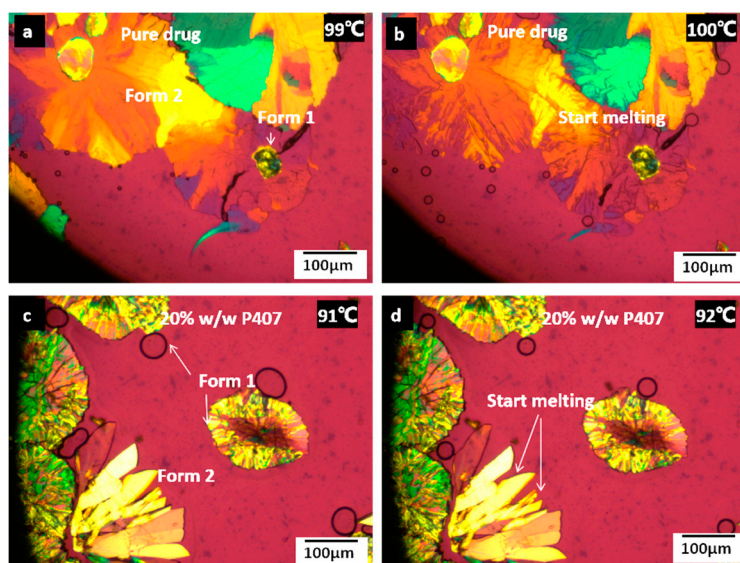

Figure S2. The polarized light microscopic illustration for Form 2 melting upon heating in pure drug (a,b); in the presence of 20% w/w PEO at 70 °C (c,d).

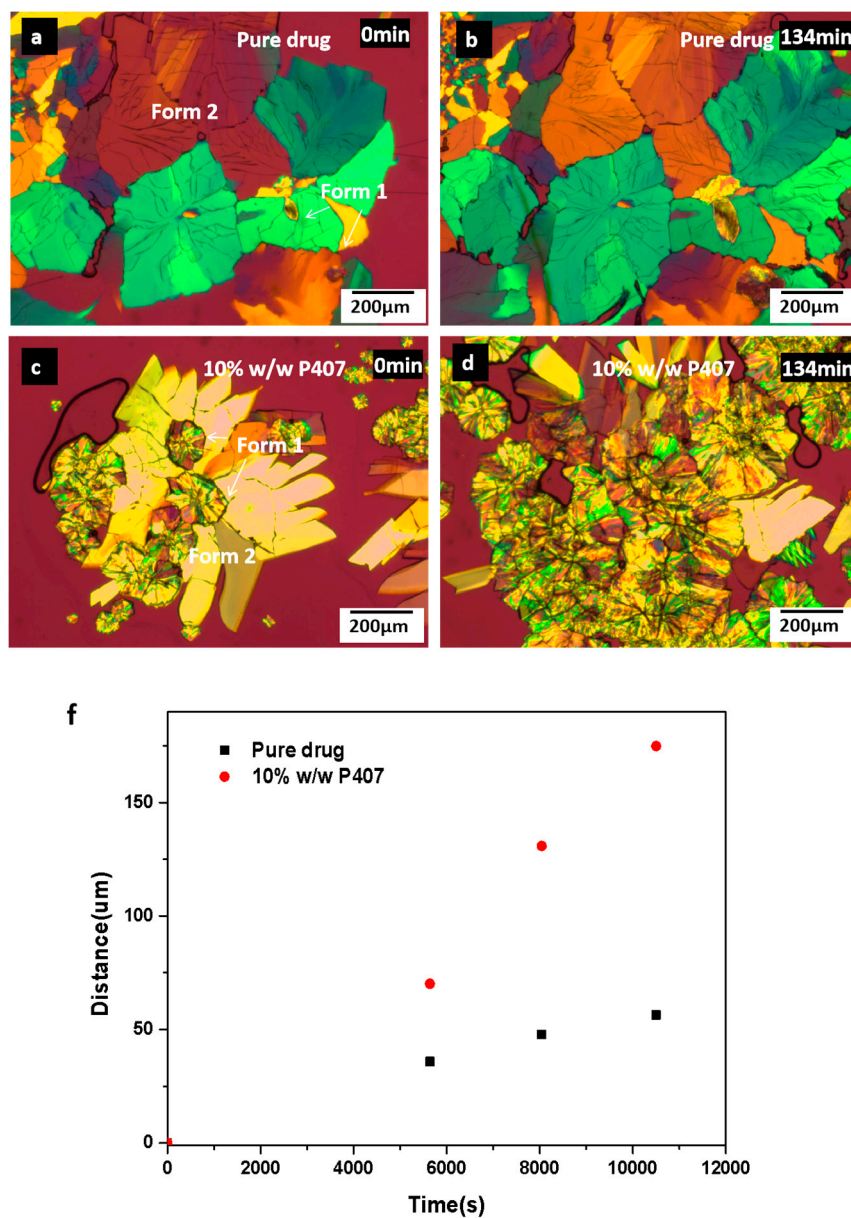

Figure S3. Photomicrographs of crystal transformation in pure drug (a,b) and in the presence of 10% w/w PEO at 70 °C (c,d) ; Typical data of transformation distance vs. time (f). The data are shifted vertically to coincide at the origin for better comparison.
